# Supplementary material for: Exposure to graphene oxide sheets alters the expression of reference genes used for real-time RT-qPCR normalization
Source: PubMed Central journal article supplement (PMC6715796; doi:10.1038/s41598-019-48970-z), 2019-08-29
Supplement: 41598_2019_48970_MOESM1_ESM.pdf [file 41598_2019_48970_MOESM1_ESM.pdf]

# SUPPORTING INFORMATION

## Exposure to graphene oxide sheets alters the expression of reference genes used for real-time RT-qPCR normalization

Irene de Lázaro<sup>1,2,\*</sup> and Kostas Kostarelos<sup>1</sup>

<sup>1</sup> Nanomedicine Lab, Faculty Biology, Medicine and Health and National Graphene Institute, AV Hill Building, The University of Manchester, Manchester M13 9PT, United Kingdom

<sup>2</sup> Present address: John A. Paulson School of Engineering and Applied Sciences, Harvard University, Cambridge, MA, 02138, USA; Wyss Institute for Biologically Inspired Engineering, Harvard University, Boston, MA, 02115, USA

---

\* Correspondence to: [idelazaro@g.harvard.edu](mailto:idelazaro@g.harvard.edu)

# Supporting Tables

**Table S1.** Physicochemical characterization of GO material used in this study.

|                                                                                | <b>Technique</b>                                          | <b>Results</b>                                         |
|--------------------------------------------------------------------------------|-----------------------------------------------------------|--------------------------------------------------------|
| <b>Lateral dimensions*</b>                                                     | <i>AFM</i>                                                | 0.050 – 0.5 $\mu\text{m}$                              |
|                                                                                | <i>TEM</i>                                                | 0.1 – 2 $\mu\text{m}$                                  |
| <b>Thickness*</b>                                                              | <i>AFM</i>                                                | 1.4 $\pm$ 0.5 nm (1-2 layers)                          |
| <b>Optical Properties</b>                                                      | <i>Absorbance</i><br>( $\lambda = 230$ nm)                | $A = 0.050 * C_{\text{GO}}$ ( $\mu\text{g/mL}$ )       |
|                                                                                | <i>Fluorescence</i><br>( $\lambda_{\text{exc}} = 525$ nm) | $F_{600} = 0.823 * C_{\text{GO}}$ ( $\mu\text{g/mL}$ ) |
| <b>Degree of defects (<math>I_D/I_G</math>)</b>                                | <i>Raman spectroscopy</i>                                 | 1.36 $\pm$ 0.03                                        |
| <b>Surface charge</b>                                                          | $\zeta$ -potential                                        | -55.9 $\pm$ 1.4 mV                                     |
| <b>Functionalisation degree</b>                                                | <i>TGA</i>                                                | 41%                                                    |
| <b>Chemical composition (Purity)</b>                                           | <i>XPS</i>                                                | C: 67.6%, O: 32.2%, (99.8%)<br>S: 0.2%                 |
| <b>C:O ratio</b>                                                               | <i>XPS</i>                                                | 2.1                                                    |
| <b><math>\pi</math>-<math>\pi</math>, O=C-O, C=O,<br/>C-O-C, C-C &amp; C=C</b> | <i>XPS</i>                                                | 3.0%, 15.3%, 31.2%,<br>11.3%, 39.2%                    |

\*Lateral dimensions and thickness are reported as a range between the minimum and maximum sizes detected. Full characterization of the material is provided in Mukherjee et al<sup>15</sup>.

**Table S2.** MIQE checklist.

See separate XLS file

**Table S3.** RNA yield and integrity assessment, MCF7 samples.

| Sample      | [RNA] µg/ml | A <sub>260/280</sub> | A <sub>260/230</sub> | 28S/18S | RIN |
|-------------|-------------|----------------------|----------------------|---------|-----|
| Untreated 1 | 554         | 2.01                 | 2.1                  | 3.0     | 9.2 |
| Untreated 2 | 583         | 2.06                 | 2.02                 | 2.4     | 9.2 |
| Untreated 3 | 535         | 1.87                 | 1.93                 | 3.2     | 9.5 |
| 5 µg/ml 1   | 559         | 2.02                 | 2.08                 | 3.8     | 9.3 |
| 5 µg/ml 2   | 639         | 2.04                 | 2.18                 | 2.5     | 9.6 |
| 5 µg/ml 3   | 563         | 2.02                 | 1.82                 | 2.8     | 9.3 |
| 10 µg/ml 1  | 636         | 2.02                 | 1.99                 | 3.7     | 9.4 |
| 10 µg/ml 2  | 597         | 2.01                 | 2.11                 | 3.3     | 9.4 |
| 10 µg/ml 3  | 723         | 2.03                 | 2.19                 | 3.9     | 9.4 |
| 50 µg/ml 1  | 523         | 1.79                 | 1.70                 | 3.0     | 9.6 |
| 50 µg/ml 2  | 594         | 2.02                 | 1.75                 | 3.0     | 9.8 |
| 50 µg/ml 3  | 529         | 1.99                 | 2.09                 | 2.7     | 9.8 |

[RNA] µg/ml, A<sub>260/A280</sub> and A<sub>260/230</sub> are calculated by spectroscopy; 28S/18S ratios and RIN numbers are calculated upon RNA denaturation and electrophoretic separation (**Figure S1, a**). The table shows the results corresponding to all four experimental groups, n=3.

**Table S4.** RNA yield and integrity assessment, MEF samples.

| Sample      | [RNA] µg/ml | A <sub>260/280</sub> | A <sub>260/230</sub> | 28S/18S | RIN |
|-------------|-------------|----------------------|----------------------|---------|-----|
| Untreated 1 | 358         | 1.89                 | 1.88                 | 3.1     | 9.1 |
| Untreated 2 | 333         | 1.96                 | 1.93                 | 2.8     | 9.3 |
| Untreated 3 | 324         | 2.01                 | 2.19                 | 2.7     | 9.3 |
| 5 µg/ml 1   | 266         | 2.09                 | 1.71                 | 2.2     | 9.6 |
| 5 µg/ml 2   | 223         | 2.03                 | 2.1                  | 2.5     | 8.9 |
| 5 µg/ml 3   | 246         | 1.99                 | 2.14                 | 2.4     | 9.1 |
| 10 µg/ml 1  | 371         | 1.82                 | 1.95                 | 2.5     | 9.3 |
| 10 µg/ml 2  | 263         | 1.77                 | 1.77                 | 2.1     | 9.3 |
| 10 µg/ml 3  | 252         | 1.92                 | 1.77                 | 2.3     | 9.3 |
| 50 µg/ml 1  | 96          | 1.96                 | 2.04                 | 2.0     | 9.4 |
| 50 µg/ml 2  | 176         | 1.99                 | 2.09                 | 2.4     | 9.2 |
| 50 µg/ml 3  | 110         | 1.71                 | 1.75                 | 2.6     | 9.3 |

[RNA] µg/ml, A<sub>260/A280</sub> and A<sub>260/230</sub> are calculated by spectroscopy; 28S/18S ratios and RIN numbers are calculated upon RNA denaturation and electrophoretic separation (**Figure S1, b**). The table shows the results corresponding to all four experimental groups, n=3.

**Table S5.** Details of primer pairs used in MCF7 study (human).

| Gene symbol  | Accession number (mRNA)                                                                                                                                     | Primer sequences                                                            | Amplicon size (bp) | E    | R <sup>2</sup> |
|--------------|-------------------------------------------------------------------------------------------------------------------------------------------------------------|-----------------------------------------------------------------------------|--------------------|------|----------------|
| <b>RPS13</b> | NM_001017.2                                                                                                                                                 | <b>Fwd</b> CGCTCTCCTTTTCGTTGCCT<br><b>Rv</b> CGCTGCGTCGATAGGGTAAA           | 96                 | 2.11 | 0.9956         |
| <b>RPL27</b> | NM_000988.3                                                                                                                                                 | <b>Fwd</b> ATCGCCAAGAGATCAAAGATAA<br><b>Rv</b> TCTGAAGACATCCTTATTGACG       | 123                | 2.02 | 0.9993         |
| <b>RPL30</b> | NM_000989.3                                                                                                                                                 | <b>Fwd</b> ACAGCATGCGGAAAATACTAC<br><b>Rv</b> AAAGGAAAATTTTGCAGGTTT         | 158                | 1.99 | 0.9987         |
| <b>OAZ1</b>  | NM_004152.3<br>NM_001301020.1                                                                                                                               | <b>Fwd</b> CTCCACTGCTGTAGTAACCCG<br><b>Rv</b> GATCCCTCTGACTATTCCCTCG        | 104                | 1.75 | 0.9998         |
| <b>ACTB</b>  | NM_001101.3                                                                                                                                                 | <b>Fwd</b> AGCACAGAGCCTCGCCTTT<br><b>Rv</b> GAGCGCGGCGATATCATCA             | 82                 | 2.0  | 0.9961         |
| <b>GAPDH</b> | NM_001289746.1<br>NM_001289745.1<br>NM_001256799.2<br>NM_002046.5                                                                                           | <b>Fwd</b> CCACATGGCCTCCAAGGAGTAAGAC<br><b>Rv</b> AGGAGGGGAGATTCAGTGTGGTGGG | 131                | 2.0  | 0.9984         |
| <b>MAPK1</b> | NM_002745.4<br>NM_138957.3                                                                                                                                  | <b>Fwd</b> TCCCAAATGCTGACTCCAAAG<br><b>Rv</b> CATGTCGAACTTGAATGGTGC         | 164                | 2.08 | 0.9993         |
| <b>UBC</b>   | NM_021009.6                                                                                                                                                 | <b>Fwd</b> GCCTTAGAACCCCAAGTATCAG<br><b>Rv</b> AAGAAAACCAAGTGCCCTAGAG       | 74                 | 1.98 | 0.9907         |
| <b>HMBS</b>  | NM_000190.3<br>NM_001024382.1<br>NM_001258208.1<br>NM_001258209.1<br>XM_017017629.1<br>XM_005271531.1<br>XM_005271532.1<br>XM_005271533.3<br>XM_011542796.1 | <b>Fwd</b> AGCTTGCTCGCATAACAGACG<br><b>Rv</b> AGCTCCTTGGTAAACAGGCTT         | 157                | 2.03 | 0.9990         |
| <b>TBP</b>   | NM_003194.4<br>NM_001172085.1                                                                                                                               | <b>Fwd</b> CCACTCACAGACTCTCACAAC<br><b>Rv</b> CTGCGGTACAATCCCAGAACT         | 127                | 2.00 | 0.9968         |

E, efficiency of qPCR reaction; R<sup>2</sup>, coefficient of determination from linear regression of Cq values (cDNA serial dilution). Primer pairs amplify all transcription variants with equal amplicon length.

**Table S6.** Details of primer pairs used in MEF study (mouse).

| Gene symbol  | Accession number (mRNA)                         | Primer sequences                                                      | Amplicon size (bp) | E    | R <sup>2</sup> |
|--------------|-------------------------------------------------|-----------------------------------------------------------------------|--------------------|------|----------------|
| <b>Rps13</b> | NM_026533.3                                     | <b>Fwd</b> CCCAGGTCCGTTTTGTGACT<br><b>Rv</b> TCCTCTCAAGGTGCTTTTCGG    | 132                | 2.01 | 0.9972         |
| <b>Rpl27</b> | NM_011289.3                                     | <b>Fwd</b> CAAAAACGCAGTGCCCGA<br><b>Rv</b> CTTACGGAGAGGTGGCTTCA       | 120                | 2.27 | 0.9907         |
| <b>Rpl30</b> | NM_009083.4<br>NM_001163485.1                   | <b>Fwd</b> GAAGAGCTTTGCATTGTGGGAG<br><b>Rv</b> CCATCTTCCTGCCTTAGGTGC  | 102                | 1.95 | 0.9948         |
| <b>OAZ1</b>  | NM_008753.4<br>NM_001301034.1                   | <b>Fwd</b> GGGTTGCCCTTAATTGCTGT<br><b>Rv</b> TCTTGTGCGTTAGACGTCGGC    | 187                | 1.99 | 0.9985         |
| <b>Actb</b>  | NM_007393.5                                     | <b>Fwd</b> CTGAGCTGCGTTTTACACCC<br><b>Rv</b> CGCCTTCACCGTTCCAGTTT     | 200                | 1.93 | 0.9995         |
| <b>Gapdh</b> | NM_001289726.1<br>NM_008084.3<br>XM_017321385.1 | <b>Fwd</b> AGGTCGGTGTGAACGGATTTG<br><b>Rv</b> TGTAGACCATGTAGTTGAGGTCA | 123                | 2.00 | 0.9988         |
| <b>Mapk1</b> | NM_011949.3<br>NM_001038663.1<br>XM_006522147.3 | <b>Fwd</b> GGTTGTTCCCAAATGCTGACT<br><b>Rv</b> CAACTTCAATCCTCTTGTGAGGG | 84                 | 1.99 | 0.9979         |
| <b>Ubc</b>   | NM_019639.4                                     | <b>Fwd</b> CAAACAGGAAGACAGACGTACC<br><b>Rv</b> CCCATCACACCCAAGAACAAG  | 80                 | 2.04 | 0.9986         |
| <b>Hmbs</b>  | NM_013551.2<br>NM_001110251.1                   | <b>Fwd</b> ATCTTGACCTAGTGAGTGTGT<br><b>Rv</b> GTACAGTTGCCCATCTTTCATCA | 141                | 2.01 | 0.9985         |
| <b>Tbp</b>   | NM_013684.3                                     | <b>Fwd</b> TTTGGCTAGGTTTCTGCGGT<br><b>Rv</b> GCCCTGAGCATAAGGTGGAA     | 195                | 2.04 | 0.9984         |

E, efficiency of qPCR reaction; R<sup>2</sup>, coefficient of determination from linear regression of C<sub>q</sub> values (cDNA serial dilution). Primer pairs amplify all transcription variants with equal amplicon length.

# Supporting Figures

## Supporting Figure 1

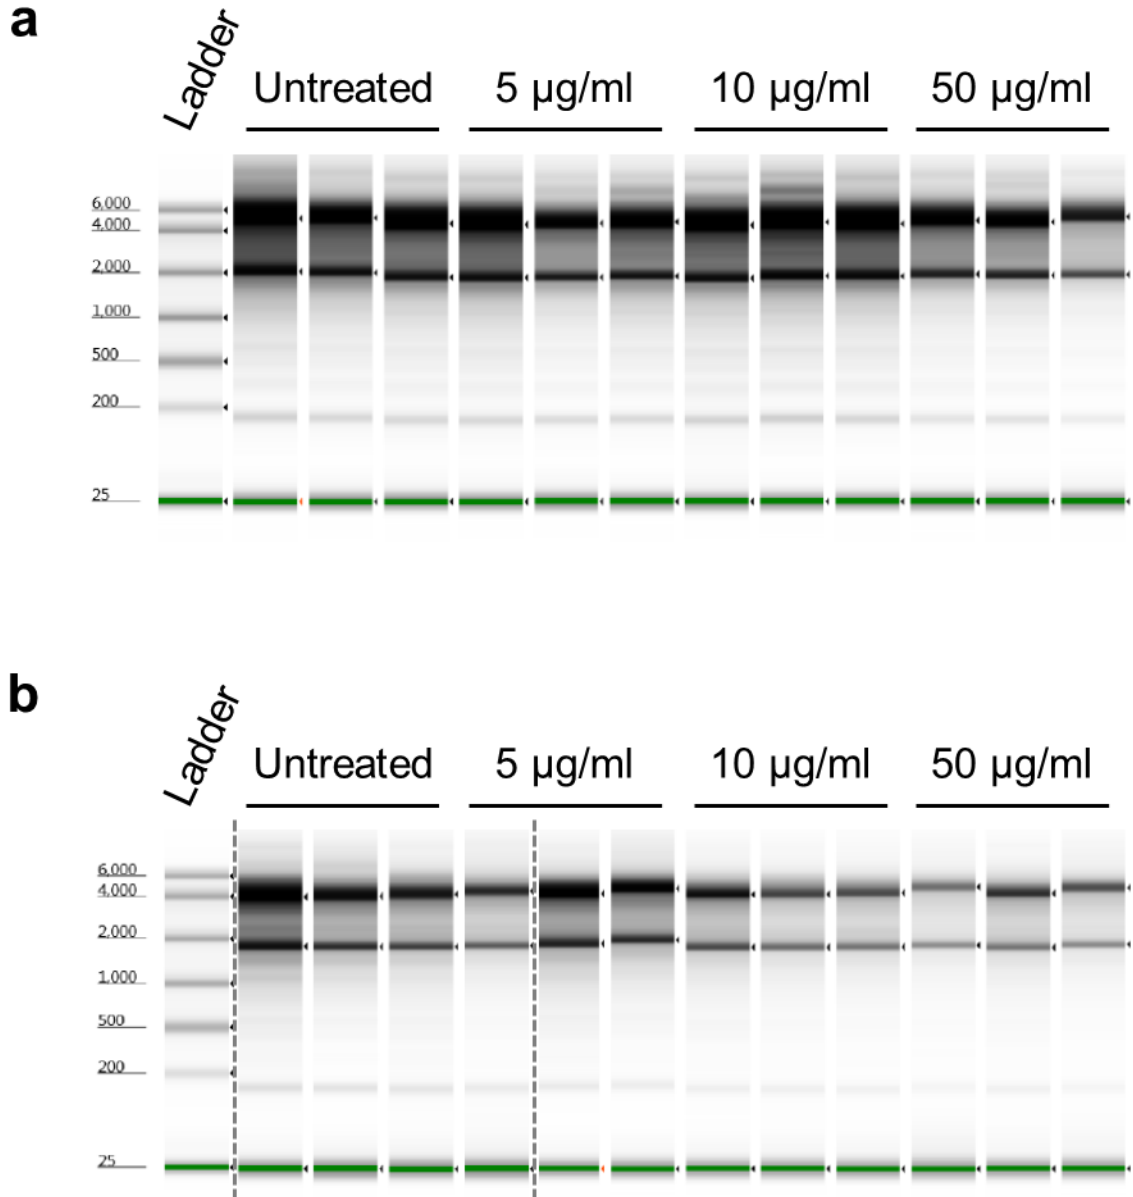

**Figure S1. Analysis of RNA integrity on the 2200 TapeStation system.** Gel electrophoresis shows the separation profile of individual (a) MCF7 and (b) MEF samples, including 28S, 18S, small rRNAs and lower marker. RIN numbers and 28S/18S ratios are provided in **Tables S3 and S4**. When gels have been cropped to organize the samples in consecutive order, cropping sites are delineated by grey dashed lines.

## Supporting Figure 2

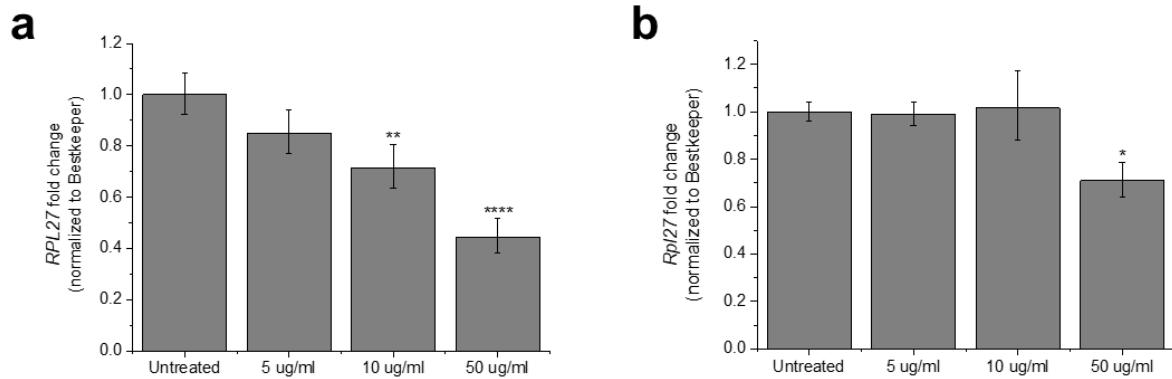

**Figure S2. *RPL27* mRNA levels normalized to Bestkeeper index. (a) *RPL27* expression in MCF7 cells exposed to GO, normalized to Bestkeeper index. (b) *Rpl27* expression in MEFs exposed to GO, normalized to Bestkeeper index. Bars represent fold change; error bars represent propagation of standard error (SE). \*p<0.05, \*\*p<0.01 and \*\*\*\*p<0.0001, assessed by one-way ANOVA and Tukey's test, n=3.**

## Supporting Figure 3

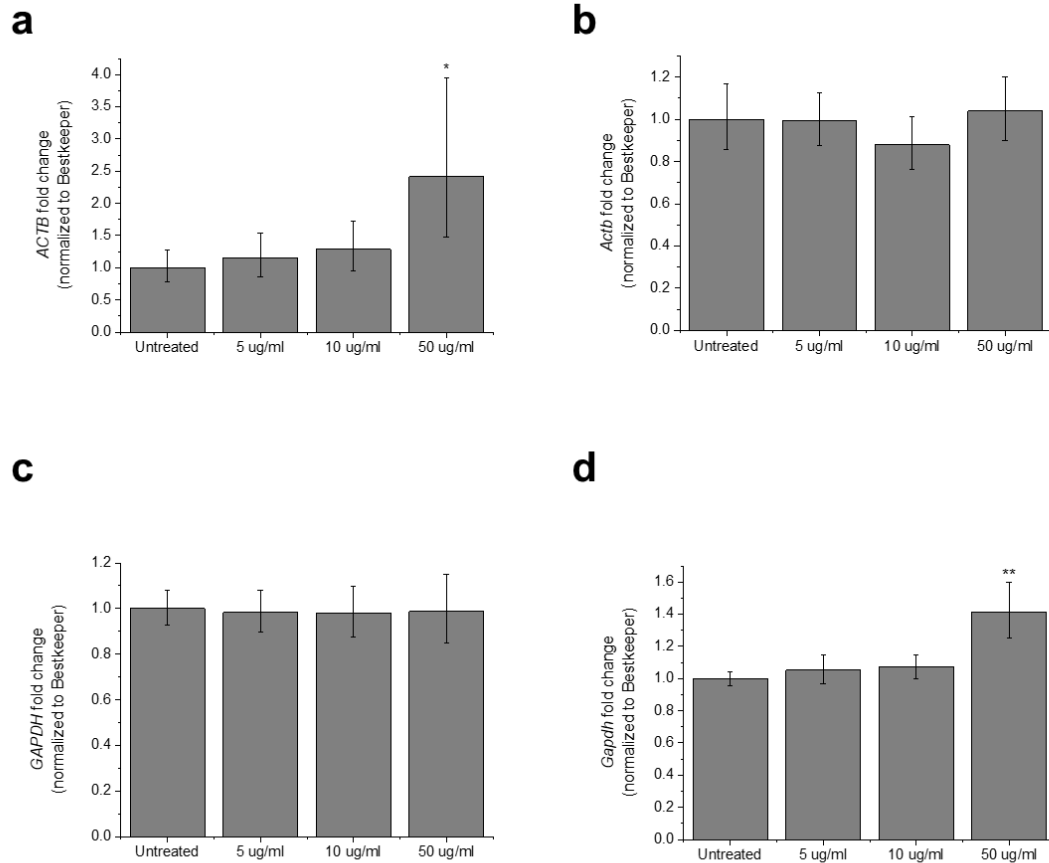

**Figure S3. *ACTB* and *Gapdh* mRNA levels normalized to Bestkeeper index. (a) *ACTB* and (b) *GAPDH* expression in MCF7 cells exposed to GO, normalized to Bestkeeper index. (c) *Actb* and (d) *Gapdh* expression in MEFs exposed to GO, normalized to Bestkeeper index. Bars represent fold change; error bars represent propagation of standard error (SE). \* $p < 0.05$  and \*\* $p < 0.01$ , assessed by one-way ANOVA and Tukey's test,  $n = 3$ .**
